# Supplementary material for: C-phycocyanin protects against low fertility by inhibiting reactive oxygen species in aging mice
Source: PubMed Central journal article supplement (PMC4951220; doi:10.18632/oncotarget.8165), 2016-03-17
Supplement: oncotarget-07-17393-s001.pdf [file oncotarget-07-17393-s001.pdf]

## C-phycoerythrin protects against low fertility by inhibiting reactive oxygen species in aging mice

### Supplementary Material

Table S1-1. PC did not affect organ weight in D-gal-induced aging mice

| Treatment | Organ weight (mg)                 |                                      |                                    |                                     |
|-----------|-----------------------------------|--------------------------------------|------------------------------------|-------------------------------------|
|           | Mean $\pm$ SEM ( <i>n</i> )       |                                      |                                    |                                     |
|           | Ovary                             | Liver                                | Spleen                             | Kidney                              |
| Ctrl      | 44.95 $\pm$ 1.11 (6) <sup>a</sup> | 1535.92 $\pm$ 20.36 (6) <sup>a</sup> | 104.33 $\pm$ 3.37 (6) <sup>a</sup> | 347.73 $\pm$ 9.09 (6) <sup>a</sup>  |
| D-gal     | 40.40 $\pm$ 1.17 (6) <sup>a</sup> | 1506.22 $\pm$ 94.31 (6) <sup>a</sup> | 99.47 $\pm$ 4.26 (6) <sup>a</sup>  | 353.48 $\pm$ 12.43 (6) <sup>a</sup> |
| D-gal+PC  | 41.77 $\pm$ 3.16 (6) <sup>a</sup> | 1427.40 $\pm$ 76.66 (6) <sup>a</sup> | 95.23 $\pm$ 4.94 (6) <sup>a</sup>  | 323.30 $\pm$ 12.73 (6) <sup>a</sup> |

Within column, data without common superscript letters indicate significant difference ( $P < 0.05$ ). *n* indicates the number of mice for each treatment.

Table S1-2. PC reversed some organ coefficients in D-gal-induced aging mice

| Treatment | Organ coefficient (mg/g)         |                                   |                                  |                                   |
|-----------|----------------------------------|-----------------------------------|----------------------------------|-----------------------------------|
|           | Mean $\pm$ SEM ( <i>n</i> )      |                                   |                                  |                                   |
|           | Ovary/body                       | Liver/body                        | Spleen/body                      | Kidney/body                       |
| Ctrl      | 1.54 $\pm$ 0.08 (6) <sup>a</sup> | 52.31 $\pm$ 1.28 (6) <sup>a</sup> | 3.55 $\pm$ 0.12 (6) <sup>a</sup> | 11.82 $\pm$ 0.25 (6) <sup>a</sup> |
| D-gal     | 1.23 $\pm$ 0.05 (6) <sup>b</sup> | 45.73 $\pm$ 3.28 (6) <sup>a</sup> | 3.01 $\pm$ 0.14 (6) <sup>b</sup> | 10.69 $\pm$ 0.35 (6) <sup>b</sup> |
| D-gal+PC  | 1.50 $\pm$ 0.11 (6) <sup>a</sup> | 51.34 $\pm$ 2.26 (6) <sup>a</sup> | 3.42 $\pm$ 0.13 (6) <sup>a</sup> | 11.61 $\pm$ 0.15 (6) <sup>a</sup> |

Within column, data without common superscript letters indicate significant difference ( $P < 0.05$ ). *n* indicates the number of mice for each treatment.

Table S2-1. PC did not increase oocyte number in D-gal-induced aging mice

| Treatment | Oocyte number per mouse           |                                   |
|-----------|-----------------------------------|-----------------------------------|
|           | Mean $\pm$ SEM ( <i>n</i> )       |                                   |
|           | 0 h after hCG                     | 14 h after hCG                    |
| Ctrl      | 57.83 $\pm$ 6.89 (6) <sup>a</sup> | 54.17 $\pm$ 1.80 (6) <sup>a</sup> |
| D-gal     | 50.67 $\pm$ 3.92 (6) <sup>a</sup> | 55.17 $\pm$ 4.56 (6) <sup>a</sup> |
| D-gal+PC  | 52.00 $\pm$ 8.12 (6) <sup>a</sup> | 51.67 $\pm$ 4.96 (6) <sup>a</sup> |

Within column, data without common superscript letters indicate significant difference ( $P < 0.05$ ).  
*n* indicates the number of mice for each treatment

Table S2-2. PC increased oocyte PB1 extrusion in D-gal-induced aging mice

| Treatment | PB1 extrusion (%)                 |                                   |
|-----------|-----------------------------------|-----------------------------------|
|           | Mean $\pm$ SEM ( <i>n</i> )       |                                   |
|           | <i>in vivo</i> maturation         | <i>in vitro</i> maturation        |
| Ctrl      | 90.03 $\pm$ 2.05 (6) <sup>a</sup> | 83.61 $\pm$ 1.13 (6) <sup>a</sup> |
| D-gal     | 69.72 $\pm$ 1.29 (6) <sup>b</sup> | 47.45 $\pm$ 4.13 (6) <sup>b</sup> |
| D-gal+PC  | 85.15 $\pm$ 3.09 (6) <sup>a</sup> | 71.11 $\pm$ 2.82 (6) <sup>c</sup> |

Within column, data without common superscript letters indicate significant difference (ab,  $P < 0.001$ ;  
ac,  $P < 0.05$ ; bc,  $P < 0.01$ ).  
*n* indicates the number of mice for each treatment.

Table S2-3. PC inhibited oocyte fragmentation in D-gal-induced aging mice

| Treatment | Fragmentation (%)                 |                                   |
|-----------|-----------------------------------|-----------------------------------|
|           | Mean $\pm$ SEM ( <i>n</i> )       |                                   |
|           | <i>in vivo</i> maturation         | <i>in vitro</i> maturation        |
| Ctrl      | 5.78 $\pm$ 0.52 (7) <sup>a</sup>  | 9.67 $\pm$ 0.58 (6) <sup>a</sup>  |
| D-gal     | 13.08 $\pm$ 1.60 (6) <sup>b</sup> | 36.57 $\pm$ 3.02 (6) <sup>b</sup> |
| D-gal+PC  | 7.01 $\pm$ 0.48 (7) <sup>a</sup>  | 23.34 $\pm$ 1.96 (6) <sup>c</sup> |

Within column, data without common superscript letters indicate significant difference (ab,  $P < 0.001$ ;  
ac,  $P < 0.001$ ; bc,  $P < 0.01$ ).  
*n* indicates the number of mice for each treatment.

Table S2-4. PC inhibited oocyte aneuploidy in D-gal-induced aging mice

| Treatment | Aneuploidy (%)                    |                                   |
|-----------|-----------------------------------|-----------------------------------|
|           | Mean $\pm$ SEM ( <i>n</i> )       |                                   |
|           | <i>in vivo</i> maturation         | <i>in vitro</i> maturation        |
| Ctrl      | 3.41 $\pm$ 0.52 (9) <sup>a</sup>  | 5.41 $\pm$ 0.94 (9) <sup>a</sup>  |
| D-gal     | 14.57 $\pm$ 0.35 (9) <sup>b</sup> | 18.71 $\pm$ 0.88 (9) <sup>b</sup> |
| D-gal+PC  | 7.77 $\pm$ 0.43 (9) <sup>c</sup>  | 10.19 $\pm$ 0.44 (9) <sup>c</sup> |

Within column, data without common superscript letters indicate significant difference ( $P < 0.001$ ).  
*n* indicates the number of mice for each treatment.

Table S3. PC normalized spindle chromosome complex in D-gal-induced aging mice

| Treatment | Abnormal SCCs (%)                 |  |
|-----------|-----------------------------------|--|
|           | Mean $\pm$ SEM ( <i>n</i> )       |  |
| Ctrl      | 16.31 $\pm$ 3.68 (6) <sup>a</sup> |  |
| D-gal     | 43.32 $\pm$ 2.28 (6) <sup>b</sup> |  |
| D-gal+PC  | 21.40 $\pm$ 3.01 (6) <sup>a</sup> |  |

Data without common superscript letters indicate significant difference ( $P < 0.001$ ).  
*n* indicates the number of mice for each treatment.

Table S4. D-gal and PC did not influence ovary telomere length or telomerase activity

| Treatment | T/S ratio                        | Telomerase activity              |
|-----------|----------------------------------|----------------------------------|
|           | Mean $\pm$ SEM ( <i>n</i> )      | Mean $\pm$ SEM ( <i>n</i> )      |
| Ctrl      | 1.22 $\pm$ 0.03 (8) <sup>a</sup> | 1.60 $\pm$ 0.06 (6) <sup>a</sup> |
| D-gal     | 1.20 $\pm$ 0.02 (8) <sup>a</sup> | 1.49 $\pm$ 0.03 (6) <sup>a</sup> |
| D-gal+PC  | 1.18 $\pm$ 0.02 (8) <sup>a</sup> | 1.62 $\pm$ 0.09 (6) <sup>a</sup> |

Within column, data without common superscript letters indicate significant difference ( $P < 0.05$ ).  
*n* indicates the number of mice for each treatment.

Table S5-1. PC rescued the expression of some antioxidant genes

| Gene name    | Treatment ( <i>n</i> )   |                           |                           | superscript letters annotation                                 |
|--------------|--------------------------|---------------------------|---------------------------|----------------------------------------------------------------|
|              | Ctrl (6)                 | D-gal (6)                 | D-gal+PC (6)              |                                                                |
| <i>Gclm</i>  | 1.02 ± 0.01 <sup>a</sup> | 1.66 ± 0.19 <sup>b</sup>  | 1.22 ± 0.20 <sup>ab</sup> | ab, <i>P</i> < 0.05                                            |
| <i>Gclc</i>  | 1.02 ± 0.00 <sup>a</sup> | 1.58 ± 0.16 <sup>b</sup>  | 1.02 ± 0.15 <sup>ac</sup> | ab, <i>P</i> < 0.05; bc, <i>P</i> < 0.01                       |
| <i>Gpx1</i>  | 1.02 ± 0.01 <sup>a</sup> | 1.60 ± 0.22 <sup>a</sup>  | 1.21 ± 0.17 <sup>a</sup>  | <i>P</i> > 0.05                                                |
| <i>Gpx3</i>  | 1.02 ± 0.00 <sup>a</sup> | 1.49 ± 0.19 <sup>b</sup>  | 0.63 ± 0.10 <sup>c</sup>  | ab, <i>P</i> < 0.05; ac, <i>P</i> < 0.05; bc, <i>P</i> < 0.001 |
| <i>Gsr</i>   | 1.02 ± 0.01 <sup>a</sup> | 1.27 ± 0.14 <sup>a</sup>  | 1.12 ± 0.16 <sup>a</sup>  | <i>P</i> > 0.05                                                |
| <i>Gsta4</i> | 1.02 ± 0.01 <sup>a</sup> | 1.35 ± 0.14 <sup>a</sup>  | 1.19 ± 0.13 <sup>a</sup>  | <i>P</i> > 0.05                                                |
| <i>Gstm1</i> | 1.02 ± 0.00 <sup>a</sup> | 1.30 ± 0.19 <sup>a</sup>  | 1.31 ± 0.22 <sup>a</sup>  | <i>P</i> > 0.05                                                |
| <i>Gstm2</i> | 1.02 ± 0.01 <sup>a</sup> | 1.29 ± 0.14 <sup>a</sup>  | 1.23 ± 0.13 <sup>a</sup>  | <i>P</i> > 0.05                                                |
| <i>Gstt1</i> | 1.02 ± 0.00 <sup>a</sup> | 1.36 ± 0.13 <sup>a</sup>  | 1.19 ± 0.20 <sup>a</sup>  | <i>P</i> > 0.05                                                |
| <i>Mgst1</i> | 1.02 ± 0.00 <sup>a</sup> | 1.33 ± 0.22 <sup>ab</sup> | 1.75 ± 0.25 <sup>b</sup>  | ab, <i>P</i> < 0.05                                            |
| <i>Sod1</i>  | 1.02 ± 0.00 <sup>a</sup> | 1.37 ± 0.12 <sup>a</sup>  | 1.01 ± 0.14 <sup>a</sup>  | <i>P</i> > 0.05                                                |
| <i>Sod2</i>  | 1.02 ± 0.00 <sup>a</sup> | 1.30 ± 0.14 <sup>ab</sup> | 1.73 ± 0.29 <sup>b</sup>  | ab, <i>P</i> < 0.05                                            |
| <i>Cat</i>   | 1.03 ± 0.01 <sup>a</sup> | 0.76 ± 0.08 <sup>b</sup>  | 1.33 ± 0.11 <sup>c</sup>  | ab, <i>P</i> < 0.05; ac, <i>P</i> < 0.05; bc, <i>P</i> < 0.001 |
| <i>Glx1</i>  | 1.01 ± 0.00 <sup>a</sup> | 1.35 ± 0.08 <sup>a</sup>  | 0.84 ± 0.09 <sup>a</sup>  | <i>P</i> > 0.05                                                |
| <i>Glx2</i>  | 1.02 ± 0.00 <sup>a</sup> | 1.67 ± 0.21 <sup>b</sup>  | 1.26 ± 0.18 <sup>ab</sup> | ab, <i>P</i> < 0.05                                            |
| <i>Prdx3</i> | 1.02 ± 0.00 <sup>a</sup> | 1.32 ± 0.13 <sup>a</sup>  | 1.24 ± 0.19 <sup>a</sup>  | <i>P</i> > 0.05                                                |
| <i>Txn2</i>  | 1.03 ± 0.01 <sup>a</sup> | 1.85 ± 0.15 <sup>b</sup>  | 1.39 ± 0.22 <sup>ab</sup> | ab, <i>P</i> < 0.01                                            |
| <i>Txnr1</i> | 1.01 ± 0.00 <sup>a</sup> | 1.30 ± 0.13 <sup>a</sup>  | 1.47 ± 0.37 <sup>a</sup>  | <i>P</i> > 0.05                                                |
| <i>Txnr2</i> | 1.02 ± 0.01 <sup>a</sup> | 1.48 ± 0.18 <sup>a</sup>  | 1.27 ± 0.24 <sup>a</sup>  | <i>P</i> > 0.05                                                |
| <i>Ccs</i>   | 1.01 ± 0.01 <sup>a</sup> | 1.08 ± 0.14 <sup>a</sup>  | 1.16 ± 0.12 <sup>a</sup>  | <i>P</i> > 0.05                                                |

Within row, data without common superscript letters indicate significant difference (see superscript letters annotation).

*n* indicates the number of mice for each treatment.

Table S5-2. PC increased SOD activity in D-gal-induced aging mice

| Treatment | SOD activity (U/mg)             |
|-----------|---------------------------------|
|           | Mean ± SEM ( <i>n</i> )         |
| Ctrl      | 144.30 ± 3.41 (10) <sup>a</sup> |
| D-gal     | 67.92 ± 1.63 (10) <sup>b</sup>  |
| D-gal+PC  | 89.21 ± 1.49 (10) <sup>c</sup>  |

Data without common superscript letters indicate significant difference (*P* < 0.001).

*n* indicates the number of mice for each treatment.

Table S5-3. D-gal or PC did not affect GSH-Px activity

| Treatment | GSH-Px activity (U/mg)             |
|-----------|------------------------------------|
|           | Mean $\pm$ SEM ( <i>n</i> )        |
| Ctrl      | 47.78 $\pm$ 2.84 (10) <sup>a</sup> |
| D-gal     | 48.92 $\pm$ 3.39 (10) <sup>a</sup> |
| D-gal+PC  | 44.23 $\pm$ 4.59 (10) <sup>a</sup> |

Data without common superscript letters indicate significant difference ( $P < 0.05$ ).  
*n* indicates the number of mice for each treatment.

Table S5-4. PC did not reverse the increased CAT activity in D-gal-induced aging mice

| Treatment | CAT activity (U/mg)                 |
|-----------|-------------------------------------|
|           | Mean $\pm$ SEM ( <i>n</i> )         |
| Ctrl      | 25.92 $\pm$ 2.05 (10) <sup>a</sup>  |
| D-gal     | 33.21 $\pm$ 1.83 (10) <sup>b</sup>  |
| D-gal+PC  | 38.01 $\pm$ 2.74 (10) <sup>bc</sup> |

Data without common superscript letters indicate significant difference (ab,  $P < 0.05$ ; ac,  $P < 0.01$ ).  
*n* indicates the number of mice for each treatment.

Table S5-5. PC decreased MDA content in D-gal-induced aging mice

| Treatment | MDA content (mmol/g)             |
|-----------|----------------------------------|
|           | Mean $\pm$ SEM ( <i>n</i> )      |
| Ctrl      | 0.27 $\pm$ 0.02 (9) <sup>a</sup> |
| D-gal     | 0.36 $\pm$ 0.03 (9) <sup>b</sup> |
| D-gal+PC  | 0.25 $\pm$ 0.03 (9) <sup>a</sup> |

Data without common superscript letters indicate significant difference ( $P < 0.01$ ).  
*n* indicates the number of mice for each treatment.

Table S6-1. PC did not influence relative ATP level in cumulus cells or oocytes in D-gal-induced aging mice

| Treatment | Relative ATP level               |                                  |
|-----------|----------------------------------|----------------------------------|
|           | Mean $\pm$ SEM ( <i>n</i> )      |                                  |
|           | cumulus cells                    | oocytes                          |
| Ctrl      | 1.07 $\pm$ 0.14 (8) <sup>a</sup> | 1.55 $\pm$ 0.09 (8) <sup>a</sup> |
| D-gal     | 1.23 $\pm$ 0.13 (8) <sup>a</sup> | 1.40 $\pm$ 0.08 (8) <sup>a</sup> |
| D-gal+PC  | 1.33 $\pm$ 0.17 (8) <sup>a</sup> | 1.41 $\pm$ 0.09 (8) <sup>a</sup> |

Within column, data without common superscript letters indicate significant difference ( $P < 0.05$ ). *n* indicates the number of mice for each treatment.

Table S6-2. Mitochondrial distribution in D-gal-induced oocytes was normalized by PC

| Treatment | Mitochondrial distribution (%)    |                                   |
|-----------|-----------------------------------|-----------------------------------|
|           | Mean $\pm$ SEM ( <i>n</i> )       |                                   |
|           | even                              | aggregated                        |
| Ctrl      | 94.24 $\pm$ 1.39 (6) <sup>a</sup> | 5.76 $\pm$ 1.39 (6) <sup>a</sup>  |
| D-gal     | 62.03 $\pm$ 6.96 (6) <sup>b</sup> | 37.97 $\pm$ 6.96 (6) <sup>b</sup> |
| D-gal+PC  | 88.95 $\pm$ 1.57 (6) <sup>a</sup> | 11.05 $\pm$ 1.57 (6) <sup>a</sup> |

Within column, data without common superscript letters indicate significant difference ( $P < 0.001$ ). *n* indicates the number of mice for each treatment.

Table S7. PC reduced high ROS levels induced by D-gal in MII oocytes

| Treatment | ROS relative fluorescence            |
|-----------|--------------------------------------|
|           | Mean $\pm$ SEM ( <i>n</i> )          |
| Ctrl      | 123.44 $\pm$ 10.54 (6) <sup>a</sup>  |
| D-gal     | 370.14 $\pm$ 56.83 (6) <sup>b</sup>  |
| D-gal+PC  | 181.25 $\pm$ 28.22 (6) <sup>ac</sup> |

Data without common superscript letters indicate significant difference (ab,  $P < 0.001$ ; bc,  $P < 0.01$ ). *n* indicates the number of mice for each treatment.

Table S8. PC inhibited D-gal-induced early apoptosis in MII oocytes

| Treatment | Oocytes with early stage apoptosis (%) |
|-----------|----------------------------------------|
|           | Mean $\pm$ SEM ( <i>n</i> )            |
| Ctrl      | 6.19 $\pm$ 0.62 (6) <sup>a</sup>       |
| D-gal     | 19.89 $\pm$ 1.07 (6) <sup>b</sup>      |
| D-gal+PC  | 6.39 $\pm$ 1.14 (7) <sup>a</sup>       |

Data without common superscript letters indicate significant difference ( $P < 0.001$ ). *n* indicates the number of mice for each treatment.

Table S9-1. PC rescued litter size in D-gal-treated mice

| Treatment | Litter size                        |
|-----------|------------------------------------|
|           | Mean $\pm$ SEM ( <i>N</i> )        |
| Ctrl      | 8.69 $\pm$ 0.47 (16) <sup>a</sup>  |
| D-gal     | 6.15 $\pm$ 0.73 (20) <sup>b</sup>  |
| D-gal+PC  | 8.68 $\pm$ 0.67 (19) <sup>ac</sup> |

Data without common superscript letters indicate significant difference (ab,  $P < 0.05$ ; bc,  $P < 0.01$ ). *N* indicates the number of female mice with plugs and that gave birth for each treatment.

Table S9-2. Offspring birth weight was not significantly different among control, D-gal and D-gal+PC groups

| Treatment | Birth weight (g)                       |
|-----------|----------------------------------------|
|           | Mean $\pm$ SEM ( <i>N</i> , <i>n</i> ) |
| Ctrl      | 1.57 $\pm$ 0.05 (16, 139) <sup>a</sup> |
| D-gal     | 1.54 $\pm$ 0.06 (20, 123) <sup>a</sup> |
| D-gal+PC  | 1.39 $\pm$ 0.05 (19, 165) <sup>a</sup> |

Data without common superscript letters indicate significant difference ( $P < 0.05$ ). *N* indicates the number of female mice with plugs and that gave birth for each treatment. *n* indicates the total number of offspring for each treatment.



Table S9-3. Postnatal growth of female pups from weeks 1 to 8

| week | Treatment ( <i>N</i> , <i>n</i> ) |                               |                               |
|------|-----------------------------------|-------------------------------|-------------------------------|
|      | Mean $\pm$ SEM                    |                               |                               |
|      | Ctrl (16, 69)                     | D-gal (19, 62)                | D-gal+PC (19, 82)             |
| 1    | 5.28 $\pm$ 0.06 <sup>a</sup>      | 5.22 $\pm$ 0.06 <sup>a</sup>  | 5.02 $\pm$ 0.07 <sup>a</sup>  |
| 2    | 8.94 $\pm$ 0.06 <sup>a</sup>      | 8.91 $\pm$ 0.07 <sup>a</sup>  | 8.37 $\pm$ 0.08 <sup>a</sup>  |
| 3    | 13.07 $\pm$ 0.06 <sup>a</sup>     | 12.78 $\pm$ 0.07 <sup>a</sup> | 12.46 $\pm$ 0.05 <sup>a</sup> |
| 4    | 19.03 $\pm$ 0.06 <sup>a</sup>     | 18.73 $\pm$ 0.06 <sup>a</sup> | 18.26 $\pm$ 0.13 <sup>a</sup> |
| 5    | 21.06 $\pm$ 0.06 <sup>a</sup>     | 20.81 $\pm$ 0.08 <sup>a</sup> | 20.42 $\pm$ 0.07 <sup>a</sup> |
| 6    | 22.37 $\pm$ 0.06 <sup>a</sup>     | 22.26 $\pm$ 0.08 <sup>a</sup> | 21.91 $\pm$ 0.16 <sup>a</sup> |
| 7    | 23.36 $\pm$ 0.06 <sup>a</sup>     | 23.30 $\pm$ 0.08 <sup>a</sup> | 23.14 $\pm$ 0.13 <sup>a</sup> |
| 8    | 24.34 $\pm$ 0.06 <sup>a</sup>     | 24.34 $\pm$ 0.08 <sup>a</sup> | 23.97 $\pm$ 0.18 <sup>a</sup> |

Within row, data without common superscript letters indicate significant difference ( $P < 0.05$ ).

*N* indicates the number of female mice with plugs and that gave birth for each treatment. *n* indicates the total number of offspring for each treatment.

Table S9-4. Postnatal growth of male pups from weeks 1 to 8

| week | Treatment ( <i>N</i> , <i>n</i> ) |                               |                               |
|------|-----------------------------------|-------------------------------|-------------------------------|
|      | Mean $\pm$ SEM                    |                               |                               |
|      | Ctrl (16, 70)                     | D-gal (18, 61)                | D-gal+PC (18, 83)             |
| 1    | 5.21 $\pm$ 0.05 <sup>a</sup>      | 5.01 $\pm$ 0.07 <sup>a</sup>  | 4.74 $\pm$ 0.07 <sup>a</sup>  |
| 2    | 11.77 $\pm$ 0.09 <sup>a</sup>     | 11.37 $\pm$ 0.07 <sup>a</sup> | 11.51 $\pm$ 0.04 <sup>a</sup> |
| 3    | 17.15 $\pm$ 0.09 <sup>a</sup>     | 17.51 $\pm$ 0.06 <sup>a</sup> | 17.93 $\pm$ 0.07 <sup>a</sup> |
| 4    | 20.98 $\pm$ 0.09 <sup>a</sup>     | 21.44 $\pm$ 0.06 <sup>a</sup> | 21.77 $\pm$ 0.07 <sup>a</sup> |
| 5    | 24.71 $\pm$ 0.09 <sup>a</sup>     | 25.08 $\pm$ 0.06 <sup>a</sup> | 25.43 $\pm$ 0.07 <sup>a</sup> |
| 6    | 27.12 $\pm$ 0.09 <sup>a</sup>     | 27.65 $\pm$ 0.06 <sup>a</sup> | 28.05 $\pm$ 0.08 <sup>a</sup> |
| 7    | 28.54 $\pm$ 0.09 <sup>a</sup>     | 28.91 $\pm$ 0.06 <sup>a</sup> | 29.10 $\pm$ 0.08 <sup>a</sup> |
| 8    | 30.01 $\pm$ 0.11 <sup>a</sup>     | 30.19 $\pm$ 0.07 <sup>a</sup> | 30.27 $\pm$ 0.08 <sup>a</sup> |

Within row, data without common superscript letters indicate significant difference ( $P < 0.05$ ).

*N* indicates the number of female mice with plugs and that gave birth for each treatment. *n* indicates the total number of offspring for each treatment.
